# Supplementary material
Source: publisher site journal article supplement (https://www.dovepress.com/article/366495)
Supplement: Supplementary file 1 [file get_supplementary_file.php]

| Source | Searching terms/query | Search ID | Filter | result |
| --- | --- | --- | --- | --- |
| PubMed | ((((simulation[MeSH Terms]) OR (simulation[Text Word])) AND ((nurs*[Text Word]) OR (nurs*[MeSH Terms]))) AND ((student*[Text Word]) OR (student*[MeSH Terms]))) AND (((knowledge[Text Word]) OR (knowledge[MeSH Terms])) OR ((confidence[Text Word]) OR (confidence[MeSH Terms]))) |  | As of 18:00, 04/10/2021; Full article, English, 2011-2022 | 1097 |
| HINARI | ((((simulation[MeSH Terms]) OR (simulation[Text Word])) AND ((nurs*[Text Word]) OR (nurs*[MeSH Terms]))) AND ((student*[Text Word]) OR (student*[MeSH Terms]))) AND (((knowledge[Text Word]) OR (knowledge[MeSH Terms])) OR ((confidence[Text Word]) OR (confidence[MeSH Terms]))) |  | As of 18:00, 04/10/2021; Full article, English, 2011-2022 | 13023 |
| CINAHL | simulation AND nurse AND students | #1 |  | 520 |
| knowledge OR confidence | #2 |  | 54133 |
|  |  | #1 AND #2 |  | 161 |
| Other sources |  |  |  | 88 |
| Total |  |  |  | 14369 |
| Final full text relevant to our review |  |  |  | 10 |

**Appendix A**

**Table 1** Database search and result.
